# Supplementary material
Source: PubMed Central journal article supplement (PMC6321805)
Supplement: kwy231_alcaraz_web_material_final.pdf [file kwy231_alcaraz_web_material_final.pdf]

## **Social Isolation and Mortality in US Black and White Men and Women**

Kassandra I. Alcaraz, Katherine S. Eddens, Jennifer L. Blase, W. Ryan Diver, Alpa V. Patel,  
Lauren R. Teras, Victoria L. Stevens, Eric J. Jacobs, and Susan M. Gapstur

Table of Contents: Web Tables 1–3

**Web Table 1.** Association of Social Isolation Score with All-Cause Mortality, Stratified by 15 Years of Follow-up<sup>a</sup>, United States, Cancer Prevention Study II Cohort, 1982–2012

| Follow-up Time | Statistic         | Social Isolation Score |                   |                   |                   |                      | P for Trend |
|----------------|-------------------|------------------------|-------------------|-------------------|-------------------|----------------------|-------------|
|                |                   | (Least Isolated)<br>0  | 1                 | 2                 | 3                 | (Most Isolated)<br>4 |             |
| 1982–2012      | N                 | 251,164                | 208,078           | 91,755            | 25,892            | 3,293                |             |
|                | Person-Years      | 6,376,624              | 5,066,408         | 2,182,393         | 602,631           | 72,763               |             |
|                | Cases             | 99,876                 | 92,898            | 43,092            | 12,528            | 1,612                |             |
|                | Rate <sup>b</sup> | 1,661                  | 1,927             | 2,190             | 2,479             | 2,894                |             |
|                | HR (95% CI)       | 1                      | 1.06 (1.05, 1.07) | 1.13 (1.11, 1.14) | 1.21 (1.19, 1.23) | 1.43 (1.36, 1.50)    | <0.0001     |
| 1982–1997      | N                 | 251,164                | 208,078           | 91,755            | 25,892            | 3,293                |             |
|                | Person-Years      | 3,659,837              | 2,979,005         | 1,294,999         | 359,075           | 43,732               |             |
|                | Cases             | 29,809                 | 31,910            | 16,173            | 5,101             | 805                  |             |
|                | Rate <sup>b</sup> | 1,435                  | 1,716             | 2,051             | 2,461             | 3,288                |             |
|                | HR (95% CI)       | 1                      | 1.10 (1.09, 1.12) | 1.23 (1.20, 1.25) | 1.37 (1.33, 1.41) | 1.76 (1.64, 1.89)    | <0.0001     |
| 1998–2012      | N                 | 219,583                | 173,923           | 74,438            | 20,350            | 2,406                |             |
|                | Person-Years      | 2,716,787              | 2,087,403         | 887,395           | 243,555           | 29,031               |             |
|                | Cases             | 70,067                 | 60,988            | 26,919            | 7,427             | 807                  |             |
|                | Rate <sup>b</sup> | 1,745                  | 2,035             | 2,274             | 2,512             | 2,679                |             |
|                | HR (95% CI)       | 1                      | 1.04 (1.03, 1.05) | 1.08 (1.06, 1.10) | 1.13 (1.10, 1.16) | 1.22 (1.13, 1.30)    | <0.0001     |

Abbreviations: CI (confidence interval), HR (hazard ratio).

<sup>a</sup> P-interaction for 15-year strata is <0.0001.

<sup>b</sup> Deaths/100,000 Person-Years, standardized to the age distribution of the CPS-II cohort 1982–2012. Models are stratified on single-year of age and race, and adjusted for sex, smoking status, education, body mass index, and history of diabetes.

**Web Table 2.** Social Isolation Score and All-Cause Mortality Interaction with Smoking Status, United States, Cancer Prevention Study II Cohort, 1982–1997<sup>a</sup>

| Social Isolation Score | Smoking Status |      |            |         |      |            |        |      |            | <i>P</i> for Interaction |
|------------------------|----------------|------|------------|---------|------|------------|--------|------|------------|--------------------------|
|                        | Never          |      |            | Current |      |            | Former |      |            |                          |
|                        | Cases          | HR   | 95% CI     | Cases   | HR   | 95% CI     | Cases  | HR   | 95% CI     |                          |
| 0 (Least isolated)     | 11,945         |      | 1          | 7,043   | 1    |            | 8,940  |      | 1          | 0.30                     |
| 1                      | 12,211         | 1.12 | 1.09, 1.15 | 9,180   | 1.10 | 1.07, 1.14 | 8,876  | 1.08 | 1.05, 1.11 |                          |
| 2                      | 5,212          | 1.21 | 1.17, 1.25 | 5,824   | 1.21 | 1.17, 1.25 | 4,355  | 1.22 | 1.18, 1.26 |                          |
| 3                      | 1,545          | 1.40 | 1.33, 1.48 | 2,105   | 1.30 | 1.24, 1.37 | 1,208  | 1.31 | 1.24, 1.39 |                          |
| 4 (Most isolated)      | 279            | 1.74 | 1.54, 1.96 | 340     | 1.68 | 1.51, 1.88 | 161    | 1.91 | 1.64, 2.23 |                          |

Abbreviations: CI (confidence interval), HR (hazard ratio).

<sup>a</sup> Models are stratified on single-year of age, and adjusted for sex, race, education, body mass index, and history of diabetes.

**Web Table 3.** Association of Social Isolation Score with Mortality by Race and Sex, United States, Cancer Prevention Study II Cohort, 1982–1997

| Outcome                | Race/<br>Sex   | Statistic         | Social Isolation Score   |                   |                   |                   |                                      | P for<br>Trend |
|------------------------|----------------|-------------------|--------------------------|-------------------|-------------------|-------------------|--------------------------------------|----------------|
|                        |                |                   | (Least<br>Isolated)<br>0 | 1                 | 2                 | 3                 | (Most<br>Isolated) <sup>b</sup><br>4 |                |
| All-cause<br>Mortality | Black<br>Men   | Person-Years      | 36,396                   | 36,282            | 19,072            | 6,579             | 970                                  |                |
|                        |                | Deaths            | 616                      | 671               | 359               | 129               | 28                                   |                |
|                        |                | Rate <sup>a</sup> | 2,748                    | 2,974             | 3,460             | 3,553             | 8,722                                |                |
|                        |                | HR (95% CI)       | 1                        | 1.05 (0.94, 1.17) | 1.11 (0.97, 1.26) | 1.14 (0.94, 1.39) | 2.34 (1.58, 3.46)                    | 0.0047         |
|                        | White<br>Men   | Person-Years      | 1,376,770                | 1,221,902         | 573,884           | 168,773           | 15,960                               |                |
|                        |                | Deaths            | 16,595                   | 16,068            | 8,140             | 2,492             | 241                                  |                |
|                        |                | Rate <sup>a</sup> | 1,918                    | 2,185             | 2,510             | 2,883             | 3,346                                |                |
|                        |                | HR (95% CI)       | 1                        | 1.07 (1.05, 1.09) | 1.19 (1.15, 1.22) | 1.34 (1.29, 1.40) | 1.60 (1.41, 1.82)                    | <0.0001        |
|                        | Black<br>Women | Person-Years      | 66,785                   | 72,555            | 38,055            | 11,443            | 1,457                                |                |
|                        |                | Deaths            | 522                      | 757               | 503               | 168               | 28                                   |                |
|                        |                | Rate <sup>a</sup> | 1,430                    | 1,701             | 2,084             | 2,469             | 4,638                                |                |
|                        |                | HR (95% CI)       | 1                        | 1.08 (0.96, 1.20) | 1.21 (1.07, 1.38) | 1.34 (1.12, 1.60) | 2.13 (1.44, 3.15)                    | <0.0001        |
|                        | White<br>Women | Person-Years      | 2,179,887                | 1,648,267         | 663,987           | 172,280           | 25,345                               |                |
|                        |                | Deaths            | 12,076                   | 14,414            | 7,171             | 2,312             | 508                                  |                |
|                        |                | Rate <sup>a</sup> | 1,035                    | 1,387             | 1,703             | 2,125             | 3,124                                |                |
|                        |                | HR (95% CI)       | 1                        | 1.14 (1.12, 1.17) | 1.26 (1.22, 1.30) | 1.37 (1.31, 1.44) | 1.84 (1.68, 2.01)                    | <0.0001        |
| CVD<br>Mortality       | Black<br>Men   | Deaths            | 259                      | 274               | 140               | 74                |                                      |                |
|                        |                | HR (95% CI)       | 1                        | 1.02 (0.86, 1.21) | 1.04 (0.85, 1.29) | 1.51 (1.16, 1.97) | 0.0236                               |                |
|                        | White<br>Men   | Deaths            | 6,923                    | 6,693             | 3,225             | 1,041             |                                      |                |
|                        |                | HR (95% CI)       | 1                        | 1.08 (1.04, 1.11) | 1.15 (1.10, 1.20) | 1.29 (1.21, 1.38) | <0.0001                              |                |
|                        | Black<br>Women | Deaths            | 179                      | 309               | 217               | 79                |                                      |                |
|                        |                | HR (95% CI)       | 1                        | 1.17 (0.97, 1.41) | 1.37 (1.12, 1.68) | 1.49 (1.14, 1.96) | 0.0004                               |                |
|                        | White<br>Women | Deaths            | 4,066                    | 5,664             | 2,993             | 1,229             |                                      |                |
|                        |                | HR (95% CI)       | 1                        | 1.16 (1.11, 1.21) | 1.30 (1.24, 1.37) | 1.47 (1.37, 1.57) | <0.0001                              |                |
| Cancer<br>Mortality    | Black<br>Men   | Deaths            | 208                      | 220               | 127               | 45                |                                      |                |
|                        |                | HR (95% CI)       | 1                        | 1.03 (0.85, 1.25) | 1.15 (0.92, 1.44) | 1.07 (0.77, 1.49) | 0.324                                |                |
|                        | White<br>Men   | Deaths            | 5,791                    | 5,538             | 2,828             | 919               |                                      |                |
|                        |                | HR (95% CI)       | 1                        | 1.04 (1.00, 1.08) | 1.13 (1.08, 1.19) | 1.25 (1.17, 1.34) | <0.0001                              |                |
|                        | Black<br>Women | Deaths            | 213                      | 249               | 149               | 45                |                                      |                |
|                        |                | HR (95% CI)       | 1                        | 0.95 (0.79, 1.14) | 1.01 (0.81, 1.25) | 0.94 (0.68, 1.30) | 0.865                                |                |
|                        | White<br>Women | Deaths            | 5,100                    | 5,172             | 2,315             | 801               |                                      |                |
|                        |                | HR (95% CI)       | 1                        | 1.13 (1.09, 1.17) | 1.16 (1.11, 1.22) | 1.26 (1.17, 1.36) | <0.0001                              |                |

Abbreviations: CVD (cardiovascular disease), CI (confidence interval), HR (hazard ratio).

<sup>a</sup> Deaths/100,000 Person-Years, standardized to the age distribution of the CPS-II cohort 1982-2012.

<sup>b</sup> Scores 3 and 4 combined for cause-specific mortality analyses. Models stratified on single-year of age and race, and adjusted for smoking status, education, body mass index, and history of diabetes.
